# Supplementary material for: Elastase 3B mutation links to familial pancreatitis with diabetes and pancreatic adenocarcinoma
Source: JCI journal article supplement (doi:10.1172/jci129961), 2019-08-01
Supplement: sd1 [file 1]

## Supplemental Methods

### *Whole Exome Sequencing and Analysis*

Genomic DNA was extracted using standard procedures. Targeted capture and massive parallel sequencing were performed at the UCSF Institute for Human Genetics. Briefly, genomic DNA was sheared by Covaris S2 (Woburn, MA) to a target size of 200-300bp and assembled into a library with TruSeq adapters containing indexes that differentiates different libraries in a capture reaction as well as a sequencing run (Kapa Biosystems, Wilmington, MA). Libraries were pooled into a capture reaction that contains biotinylated DNA oligonucleotides (called 'baits') from Roche-Nimblegen SeqCap EZ Human Exome Library v3.0 (Madison, WI) for 72 hours. The DNA bait-DNA hybrids were then pulled out of the complex mixture by incubation with streptavidin-labeled magnetic beads and captured onto a strong magnet. After washing, the targeted DNA of interest was eluted and subjected to 18 cycles of DNA amplification. Captured DNA libraries were sequenced with the Illumina HiSeq 2500 (Hayward, CA), yielding 150 (2X75) base pairs from the final library fragments. Sequence data were mapped to the GRCh37 reference genome and analyzed using the Ingenuity Variant Analysis platform (Qiagen, Venlo, Netherlands). Variants identified by whole exome sequencing were filtered using three criteria (see also Supplemental Figure 2). First, only variants with an allele frequency consistent with published reports of hereditary CP prevalence (<0.001%) within the Genome Aggregation Database (gnomAD) database were kept. gnomAD is a highly annotated, searchable database of 141,456 human exome and genome sequences (1). Second, only variants with a scaled Combined Annotation-Dependent Depletion (CADD) score >20 were selected. The scaled CADD score is an

integrative annotation built from more than 60 genomic features, and variants with a scaled CADD score of >20 are predicted to be in the top 1% of deleterious variants in the human genome (2). Third, only variants that cosegregated with disease were kept. Sanger sequencing was performed using standard methods. Primers used for Sanger sequencing of *CELA3B*, *FOXN1*, *PRSS1* and *TJP2* variants can be found in Supplemental Table 1.

### ***Mutagenesis of Human Elastases***

p.R90C (c.C268>T) *CELA3B*, p.R90L (c.G269>T) *CELA3B*, p.S217A (c.T649>G) *CELA3B*, p.L90R (c.T269>G) *CELA3A* and p.L90C (c.C268>T, T269>G) *CELA3A* mutagenesis were achieved using the Quikchange Lightning Site-directed mutagenesis kit (Agilent Technologies) and previously published (3, 4) untagged and 9xHis-tagged *CELA3B* and *CELA3A* constructs in pcDNA3.1(-) plasmids (gifts from Miklos Sahin-Toth, Boston University, Boston, MA). *CELA3B* variants without signal peptides ( $\Delta$ SP) were generated by sequentially removing two potential start codons (No start) and converting p.A15 to p.M15 (New start) to introduce a start codon at the beginning of the pro-domain. All mutagenesis primer sequences are available in Supplemental Table 3 (Integrated DNA Technologies). Sanger sequencing of the all plasmids was performed by Quintara Biosciences using T7 Forward and BGH Reverse primers.

### ***Tissue Culture and Western Blotting***

HEK 293T cells (5)(gift from Feroz Papa at UCSF) were cultured in DMEM media supplemented with 10% FBS (Gemini Bioproducts), 100 U/mL penicillin, and 100 ug/mL streptomycin (UCSF Cell Culture Facility). All expression constructs were transfected into ~25% confluent HEK 293T cells using Opti-MEM and Lipofectamine 2000 (ThermoFisher Scientific). For protein analysis, cells were lysed in M-PER buffer (Thermo Fisher Scientific) plus phosphatase inhibitor cocktail (Cell Signaling Technologies) and protein concentration was determined using Pierce BCA Protein Assay (Thermo Fisher Scientific). For secreted protein, conditioned media was directly collected and cleared by centrifugation. Western blots were performed using 10% Bis-Tris precast SDS-PAGE gels (NuPage) on Invitrogen XCell SureLock Mini-Cell modules. Gels were run using 2-(N-morpholino)ethanesulfonic acid (MES) buffer (Invitrogen) and transferred onto nitrocellulose transfer membrane using an XCell II Blot Module or iBlot Dry Blotting System (Thermo Fisher Scientific). Antibody binding was visualized and quantified using the Odyssey CLx Imaging System (LI-COR Biosciences). Antibodies used: CELA3B (Sigma SAB1409028; 1:1,000), 6x-His Tag (ThermoFisher Scientific MA1-21315; 1:1,000), CPA1 (R&D Systems MAB 2856; 1:500), CPA2 (R&D Systems AF2896; 1:500), and  $\beta$ -actin (Sigma A5441; 1:3,000).

### ***RNA Isolation and Quantitative Real-Time PCR***

RNA was isolated from whole cells using Qiashredder and RNeasy kits (Qiagen). For cDNA synthesis, 500-1000 ng total RNA was reverse transcribed using Superscript II Reverse Transcriptase and Oligo d(T)<sub>16</sub> primer (Invitrogen). For qPCR, we used Power

SYBR Green and the StepOnePlus Real-Time PCR System (Applied Biosystems).

qPCR primers are listed in Supplemental Table 4 (Integrated DNA Technologies). Gene expression levels were normalized to  $\beta$ -actin.

### ***Protein Purification and Catalytic Assays***

Production, purification and catalytic analysis of CELA3B have been previously described (3). Briefly, HEK 293T cells transiently expressing 9xHis-tagged CELA3B variants were placed in Opti-MEM for two days and the resulting conditioned media incubated with Complete His-Tag Purification Resin (Roche) to isolate His-tagged proteins. Purified CELA3B-9xHis variants were eluted from the resin in the presence of 500 mM imidazole, dialyzed into Elastase Buffer (100 mM Tris 8.0, 1 mM  $\text{CaCl}_2$ ) using Slide-A-Lyzer Dialysis Cassettes (ThermoFisher Scientific), and concentrated using Amicon Ultra-4 Centrifugal Filter Units (Millipore). CELA3B concentrations were determined by running on 10% Bis-Tris SDS-PAGE gels, staining with Coomassie Brilliant Blue (ThermoFisher Scientific) and comparing to a bovine serum albumin (BSA) standard curve; protein concentrations were insufficient for analysis by BCA. Purified elastases were diluted to equal concentrations and proteolytically activated using Immobilized TPCK-Trypsin resin (ThermoFisher Scientific) for four hours at 4°C. Active elastases were incubated against a logarithmic concentration gradient of Succinyl-Ala-Ala-Pro-Ala-pNA (S-A-A-P-A-pNa; Bachem) and absorbance at 405 nm ( $A_{405}$ ) was measured over time. For each CELA3B variant, raw absorbance values were compared to a 4-nitroaniline (Sigma) standard curve to calculate their rates of proteolysis at each substrate concentration and, in accordance with Michaelis-Menten

enzyme kinetics, their catalytic rate ( $k_{cat}$ ) and Michaelis (Km) constants. To measure activation efficiency of CELA3B variants, conditioned media were concentrated 20x and directly applied to Immobilized TPCK-Trypsin resin for three hours at 4°C. The partially activated proteins were incubated with 800 nM S-A-A-P-A-pNa to obtain A405 values and relative rates of catalysis were normalized to CELA3B protein levels as determined by coomassie staining.

### ***CELA3B and CPA1/2 Binding Assay***

His-tagged CELA3B variants and untagged CPA1 and CPA2 (gifts from Miklos Sahin-Toth, Boston University, Boston, MA) were transiently expressed in HEK 293T cells and conditioned media was collected. Secreted levels of CELA3B variants were determined by Western blot and concentrations were leveled using conditioned media from mock-transfected cells. CELA3B variants were individually combined with CPA1 or CPA2 at a 1:1 ratio, bound to His-tag purification resin, and eluted with imidazole as described above. Indicated fractions were analyzed by Western blot for CELA3B, CPA1 and CPA2.

### ***Pulse-Chase Analysis of CELA3B Expression***

HEK 293T cells transiently expressing 9xHis-tagged CELA3B variants were starved for 30 minutes in serum-, methionine- and cysteine-free DMEM (ThermoFisher Scientific) before incubation with serum-free media containing <sup>35</sup>S-labeled methionine and cysteine (Perkin Elmer). For secretion studies, cells were pulsed with radiolabeled amino acids for one hour at room temperature before chasing with “cold” serum-free media and

collecting at the indicated time points. For degradation/stability studies, cells were pulsed and chased in the presence of 0.5  $\mu\text{g}/\text{mL}$  Brefeldin A (BFA; Cell Signaling Technology 9972) to prevent protein secretion and collected at the indicated time points. For synthesis/translation studies, cells were pulsed (no chase) in the presence of BFA and collected at the indicated time points. Cells were lysed using M-PER and CELA3B-9xHis isolated using Complete His-Tag Purification Resin (Roche). Isolated proteins were denatured and run on 10% Bis-Tris SDS-PAGE gels, dried under vacuum, and analyzed by autoradiography and densitometry (ImageJ; U.S. National Institutes of Health).

### **Generation of *Cela3b* Mutant Mice By CRISPR-Cas9**

To generate *Cela3b* mutant mice, we obtained purified Cas9, a *Cela3b*-targeting guide RNA (gRNA; 5'-CACCTACCAGGTTGTACTION-3') that targets Cas9 to a site near the R89 codon, and donor oligos for homology directed repair (HDR) resulting in p.R89C (c.C265>T) or p.R89L (c.G266T) mutations (HDR donor sequences available in Supplemental Table 5). Purified Cas9 and *Cela3b*-targeting gRNA were procured from PNA Bio; HDR oligos were obtained from Integrated DNA Technologies. All three products were injected into C57BL/6 zygotes at the Transgenic Gene Targeting Core in the Gladstone Institutes. The resulting pups were genotyped by amplifying a 496 bp region flanking the R89 site with the KAPA Mouse Genotyping Kit (KAPA Biosystems) and subsequent Sanger sequencing at Quintara Biosciences using the reverse primer (see Supplemental Table 1 for primer sequences). To expunge unlinked, off-target Cas9 modifications, three mutant founders were selected for each *Cela3b* variant and

backcrossed to genetically pure C57BL/6NJ mice (Jackson Laboratory) for three generations. Heterozygous mice from each founder line were then intercrossed to produce litters with WT, heterozygous, and homozygous animals.

***Induction of Pancreatitis and Pancreatic Histological Quantification***

To chemically induce pancreatitis, 20-week-old mice were given eight hourly injections of vehicle (PBS) or 75 µg/kg caerulein (Bachem) per day for two consecutive days. 7 days after the final injection, mice were euthanized and their pancreata were fixed in formalin, embedded in paraffin, and H&E stained. Pancreatic damage was quantified by scoring at least 9 randomly chosen high-powered fields per mouse in a blinded fashion. Tissue integrity, acinar de-differentiation and immune infiltration were scored from (0-5) and individual scores for these three categories were added to make a combined score as previously described (6).

**A**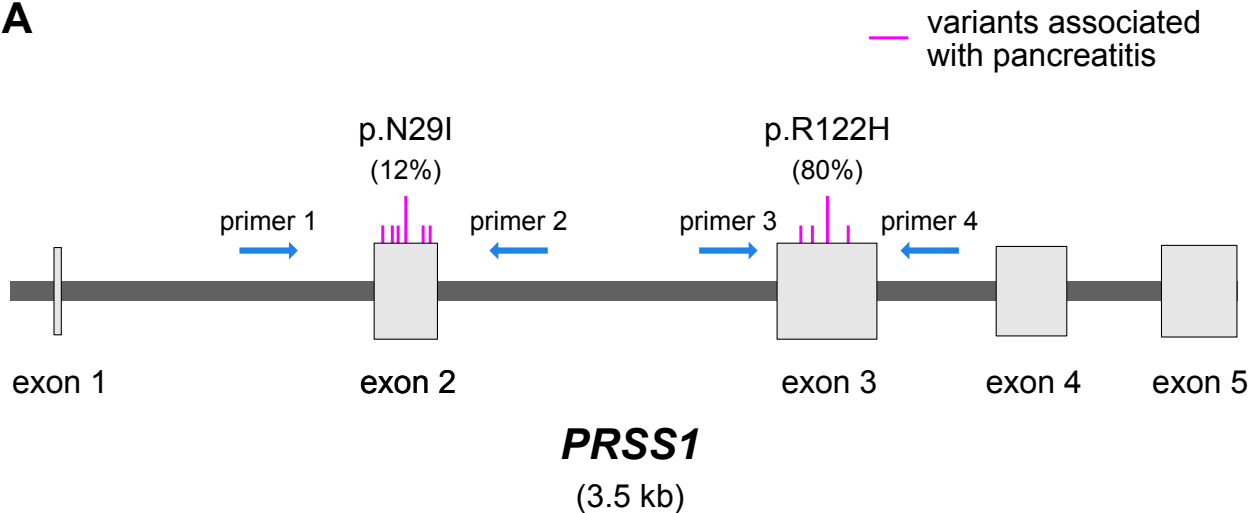**B**

p.N29I = N [AAC] > I [ATC]

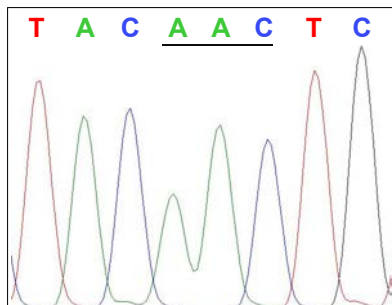

family member IV - 9

p.R122H = R [CGC] > H [CAC]

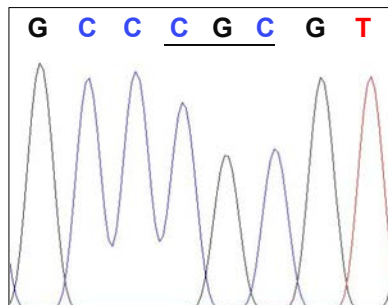

family member IV - 9

Figure S1



Variants observed in family members IV-9, IV-10, V-1, V-2

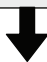

Rare variants

- includes only variants that are observed in gnomAD with an allele frequency <0.001

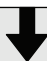

Predicted deleterious

- includes only missense, frameshift, in-frame indel, or start/stop codon changing variants with a CADD score >20

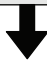

Genetic analysis

- includes only variants present in affected but not unaffected family members

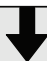

*CELA3B*, *FOXN1*, *TJP2* variants

- Confirmatory Sanger sequencing in family members IV-9, IV-10, V-1, V-2

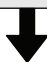

*CELA3B*, *FOXN1* variants

- *TJP2* variant found to be absent in subsequently recruited, unaffected sister (IV-11) by Sanger sequencing

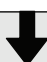

*CELA3B* p.R90C

- *CELA3B* expressed in pancreas only; *FOXN1* not expressed in pancreas
- Functional studies (*in vitro* and *in vivo* models)

Figure S2

### ***CELA3B***

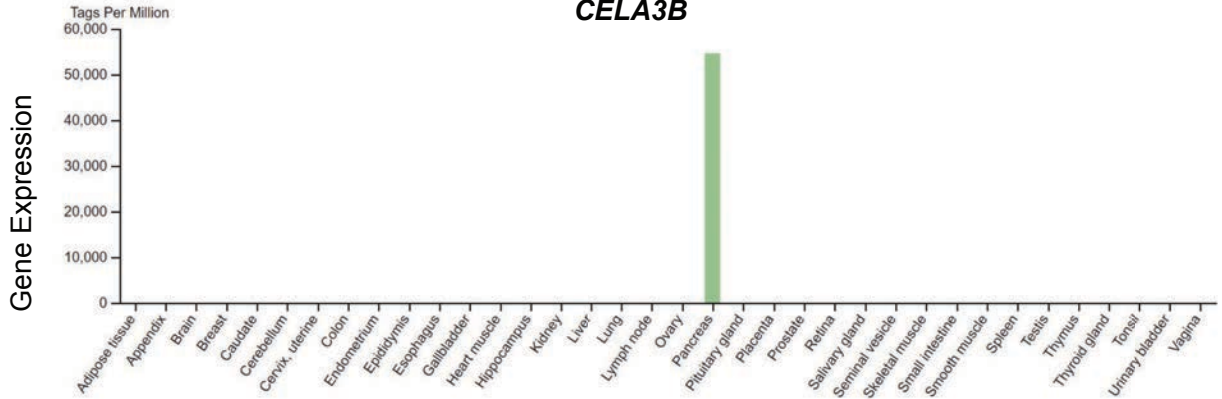

### ***FOXN1***

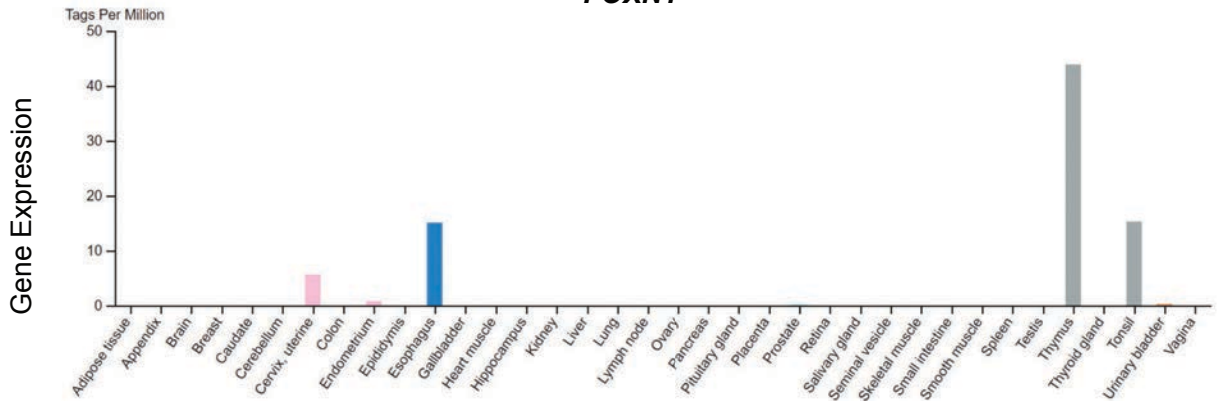

**A**

|                    |    |                  |                  |            |                      |
|--------------------|----|------------------|------------------|------------|----------------------|
| Homo sapiens       | 59 | GGSLIADPWVVTAGHC | CISSRTYQVVLGEYD  | RAVKEGPEQV | IPINSGDLFVHPLWNRSCV  |
| Rhesus macaque     | 58 | GGSLIADPWVVTAGHC | CISSSLTYQVVLGDYN | LAVKEGPEQV | IPINSGDLFVHPLWNRLCV  |
| Mus musculus       | 58 | GGSLITPDWVLTAGHC | ISTSRTYQVVLGEHE  | RGVEEGEQV  | IPINAGDLFVHPKWNSMCV  |
| Rattus norvegicus  | 58 | GGTLIADPWVMTAGHC | ISTSRTYQVVLGEFER | RGVEEGPEQV | IPVNAAGDLFVHPKWNSCV  |
| Xenopus laevis     | 58 | GGSLIAPNWVMTAAHC | CISSRTYQVVLGEHD  | RSMNEGGEQ  | IIPVANEDIFVHEKWISICA |
| Xenopus tropicalis | 58 | GGSLIAPNWVMTAAHC | CISSRQYQVVLGEHD  | RSVSEGGEQ  | ILPVTNEDIFVHEKWISICA |
| Ophiophagus hannah | 58 | GGSLIHPNWVMTAGHC | IFPQYQNKVVLGEYN  | LAKLERPEQE | ILINPGDIFVHPSWNPYCL  |

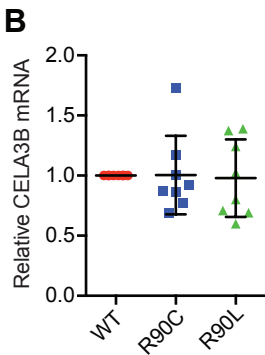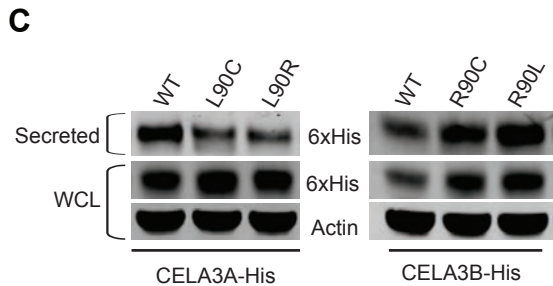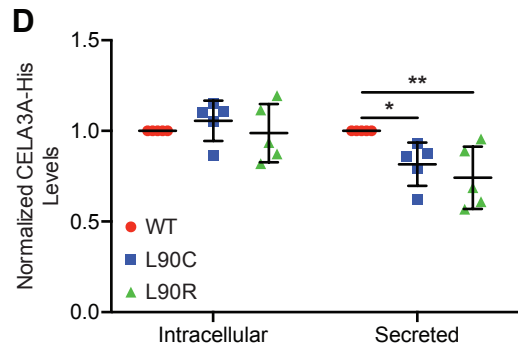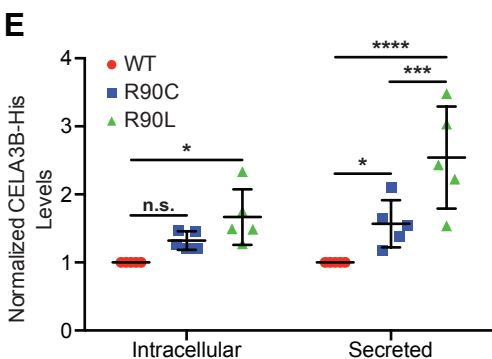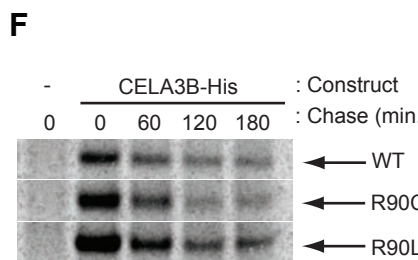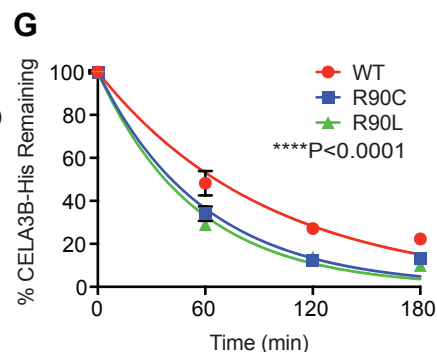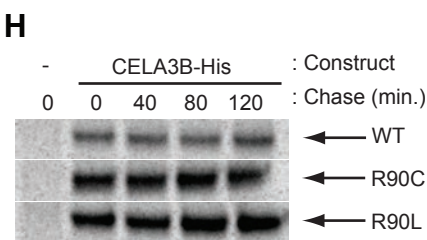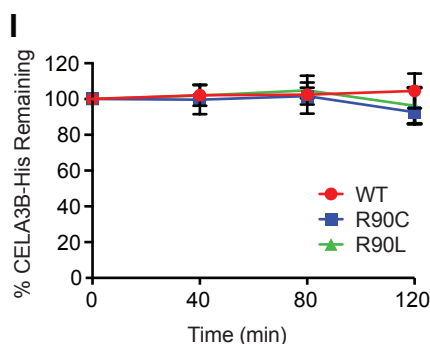

Figure S4

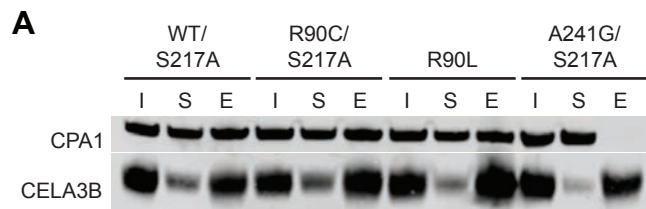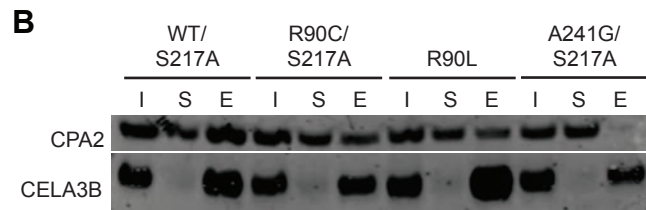

## Supplemental Figure Legends

### Supplemental Figure 1: Sanger sequencing of exons 1 and 2 of *PRSS1*. (A-C)

(A) Diagram of the *PRSS1* locus and variants commonly associated with hereditary pancreatitis. Up to 80% of people with hereditary CP have a mutation in the *PRSS1* gene, which encodes the most abundant trypsinogen secreted by the pancreas; *PRSS1* variants p.R112H and p.N29I account for >90% of *PRSS1* mutations associated with hereditary CP. (B) Chromatograms flanking the codons for N29 and R122 in the proband. Sanger sequencing of *PRSS1* exons 2 and 3 confirmed the absence of p.R112H, p.N29I and other previously associated pancreatitis variants in family members.

### Supplemental Figure 2: Flow chart of whole exome sequencing and variant analysis.

Supplemental Figure 2: Flow chart of whole exome sequencing and variant analysis. Variants were initially filtered based on rarity, likelihood to be deleterious (CADD score), and cosegregation with disease. Sanger sequencing, tissue expression profiling and extensive functional studies confirmed that c.C268>T (p.R90C) in *CELA3B* is the disease causing variant in this family. Detailed methods are provided in the Supplementary Appendix.

### Supplemental Figure 3: Expression of *CELA3B* and *FOXN1* in humans.

Supplemental Figure 3: Expression of *CELA3B* and *FOXN1* in humans. RNA expression overview across different human tissues shows selective expression of *CELA3B* in the pancreas; *FOXN1* is not expressed in the pancreas (7).

**Supplemental Figure 4: Additional functional characterization of CELA3B mutations at arginine 90. (A-I)** (A) Sequence alignment of verified CELA3B sequences from seven different species; alignments are centered on R90 from human CELA3B and labeled as in Figure 2A. (B) Quantitative reverse transcription polymerase chain reaction (RT-qPCR) quantification of *CELA3B* transcripts from samples in Figure 2B and C. (C) Immunoblots of His-tagged CELA3A and CELA3B variants. Samples are whole cell lysates (intracellular) and conditioned media (secreted protein) from 293T cells transfected with empty vector (Mock) or vector containing the indicated gene. Blots were probed with the indicated antibodies. (D) Quantification of CELA3A variant data from n=5 experiments as in C; normalized to WT CELA3A. Values are means  $\pm$  SD. (E) Quantification of CELA3B data from n=5 experiments as in C; normalized to WT CELA3B. Values are means  $\pm$  SD. (F) Autoradiographs of His-tagged CELA3B variants purified from untreated 293T cells pulsed with  $^{35}\text{S}$ -labeled methionine and cysteine and chased with unlabeled amino acids for the indicated amounts of time. First (control) lane is the same in WT and R90C images. (G) Quantification of n=4 experiments as in F, showing the percentage of each CELA3B variant remaining over the time course. Values for each time point are means  $\pm$  SD; exponential (one phase) decay used to model curves.  $P < 0.0001$  when comparing WT and either mutant. (H) Autoradiographs of His-tagged CELA3B variants purified from Brefeldin A-treated 293T cells pulsed with  $^{35}\text{S}$ -labeled methionine and cysteine and chased with unlabeled amino acids for the indicated amount of time. First (control) lane is the same in WT and R90C images. (I) Quantification of n= 4 unique experiments as in H, showing the percentage of each CELA3B variant remaining over the time course. Values for each time point are means

± SD. P values were determined by matched 1-way ANOVA (panel C) or matched 2-way ANOVA (panels D and E) with Tukey's multiple comparisons test; \*P<0.05, \*\*P<0.01, \*\*\*P<0.001 and \*\*\*\*P<0.0001.

**Supplemental Figure 5: Binding of CELA3B variants to CPA1 and CPA2. (A)**

Immunoblots of affinity-purification fractions using the indicated variants of His-tagged CELA3B in the presence of CPA1. (B) Immunoblots as in A, but in the presence of CPA2. Fractions are input (I), supernatant (S) and eluate (E). Where shown, catalytically dead (S217A) CELA3B variants were used to improve yield without affecting binding efficiency (4). All blots are representative of n=3 experiments.

### Supplemental Tables

Table S1. Sanger Sequencing Primers

| Target Gene           | Forward Primer         | Reverse Primer          |
|-----------------------|------------------------|-------------------------|
| <b>CELA3B</b>         | TGGGGAGGCTTTGGAGAATCAG | CTGTGGGTCATGGAGGGATGAG  |
| <b>Cela3b (Mouse)</b> | CCACCAGGTCTCCCTTCAGTA  | GGGCTAGAGCCTTAAGCTACCAT |
| <b>FOXN1</b>          | ATGGGAGAGTGTTGTGGGTCAG | TTTGGCTCATGAGTACCCTGGG  |
| <b>PRSS1 Exon 2</b>   | CCTAGCTTGGCAAAGAATC    | TGCCTGCTTTTCTCACTAGCT   |
| <b>PRSS1 Exon 3</b>   | CACCCCACTACCACCAAC     | CTCGAAATGTGTCTTAAGCCT   |
| <b>TJP2</b>           | AGAGGTGGCAAGAGCAGCATAA | TGACGGGATGTTGATGAGGGTC  |

Table S2. CELA3B Enzyme Kinetics\*

| CELA3B | $K_m$<br>( $\mu M$ ) | P  | $k_{cat}$<br>( $s^{-1}$ ) | P  | $k_{cat}/K_m$<br>( $M^{-1}s^{-1}$ )        | P     |
|--------|----------------------|----|---------------------------|----|--------------------------------------------|-------|
| WT     | 311.7<br>$\pm 0.6$   | -  | 14.6<br>$\pm 0.5$         | -  | $4.7 \times 10^4$<br>$\pm 1.4 \times 10^3$ | -     |
| R90C   | 306.4<br>$\pm 32.3$  | NS | 14.6<br>$\pm 0.5$         | NS | $4.8 \times 10^4$<br>$\pm 3.8 \times 10^3$ | NS    |
| R90L   | 245.2<br>$\pm 23.5$  | NS | 14.9<br>$\pm 1.7$         | NS | $6.1 \times 10^4$<br>$\pm 1.2 \times 10^3$ | <0.05 |

\*Values are averages of n=3 experiments  $\pm$  SD. Statistical significance for each constant was assessed by matched 1-way ANOVA with Tukey's multiple comparisons test; multiplicity-adjusted P values reported.



Table S3. Mutagenesis Primers

| Mutation                    | Forward Primer                      | Reverse Primer                      |
|-----------------------------|-------------------------------------|-------------------------------------|
| <b>CELA3B p.R90C</b>        | TGGGCGAGTACGACTGTGCTGTGAAGGAG       | CTCCTTCACAGCACAGTCGTA CTGCCCCA      |
| <b>CELA3B p.R90L</b>        | TGGGCGAGTACGACCTTGCTGTGAAGGAG       | CTCCTTCACAGCAAGGTCGTA CTGCCCCA      |
| <b>CELA3A p.L90R</b>        | GGGTGAGTACAACCGTGCTGTGAAGGAGG       | CCTCCTTCACAGCACGGTTGTA CTACACCC     |
| <b>CELA3A p.L90C</b>        | GGGTGAGTACA ACTGTGCTGTGAAGGAGG      | CCTCCTTCACAGCACAGTTGTA CTACACCC     |
| <b>CELA3B ΔSP No Start</b>  | CATCGCAA AACTCATAGTGCTCCGGCTGCTC    | GAGCAGCCGGAGCACTATGAGTTTTCGGATG     |
| <b>CELA3B ΔSP New Start</b> | CTCCTTGTGGCCGTTATGTCAGGCTATGGCC CAC | GTGGGCCATAGCCTGACATAACGGCCACA AGGAG |
| <b>CELA3B p.S217A</b>       | CTGCAATGGTGACGCTGGAGGACCCCT         | AGGGGTCCTCCAGCGTCACCATTGCAG         |

Table S4. qPCR Primers

| Target mRNA    | Forward Primer       | Reverse Primer         |
|----------------|----------------------|------------------------|
| <i>β-Actin</i> | GCAAATGCTTCTAGGCGGAC | AAGAAAGGGTGTAAAACGCAGC |
| <b>CELA3B</b>  | TGAGGATGCGGTCCCCTA   | GTGGCCCGTTGGTATAGAGA   |

Table S5. CRISPR HDR Donor Oligos

| <i>Cela3b</i> Mutation | Donor Oligo Sequence                                                                                                                                              |
|------------------------|-------------------------------------------------------------------------------------------------------------------------------------------------------------------|
| <b>p.R89C</b>          | AGAGTTCCACTTGGGGTGCACAAAGAGGTCTCCAGCGTTGATGGGGATCACCTGTTCTTGG<br>CCTTCCTCCACACCACATTCATGCTCGCCAAGTACAACCTGGTAGGTGCGAGAAGTCCTGC<br>GGAAGAGTGGAGGTCAGTATAAGCCTGGAGC |
| <b>p.R89L</b>          | AGAGTTCCACTTGGGGTGCACAAAGAGGTCTCCAGCGTTGATGGGGATCACCTGTTCTTGG<br>CCTTCCTCCACACCAAGTTCATGCTCGCCAAGTACAACCTGGTAGGTGCGAGAAGTCCTGC<br>GGAAGAGTGGAGGTCAGTATAAGCCTGGAGC |

## Supplemental References

1. Lek M, Karczewski KJ, Minikel EV, Samocha KE, Banks E, Fennell T, O'Donnell-Luria AH, Ware JS, Hill AJ, Cummings BB, et al. Analysis of protein-coding genetic variation in 60,706 humans. *Nature*. 2016;536(7616):285-91.
2. Ng PC, and Henikoff S. SIFT: Predicting amino acid changes that affect protein function. *Nucleic acids research*. 2003;31(13):3812-4.
3. Szabo A, and Sahin-Toth M. Determinants of chymotrypsin C cleavage specificity in the calcium-binding loop of human cationic trypsinogen. *The FEBS journal*. 2012;279(23):4283-92.
4. Szabo A, Pilsak C, Bence M, Witt H, and Sahin-Toth M. Complex Formation of Human Proelastases with Procarboxypeptidases A1 and A2. *The Journal of biological chemistry*. 2016;291(34):17706-16.
5. DuBridge RB, Tang P, Hsia HC, Leong PM, Miller JH, and Calos MP. Analysis of mutation in human cells by using an Epstein-Barr virus shuttle system. *Mol Cell Biol*. 1987;7(1):379-87.
6. Folias AE, Penaranda C, Su AL, Bluestone JA, and Hebrok M. Aberrant innate immune activation following tissue injury impairs pancreatic regeneration. *PloS one*. 2014;9(7):e102125.
7. Uhlen M, Fagerberg L, Hallstrom BM, Lindskog C, Oksvold P, Mardinoglu A, Sivertsson A, Kampf C, Sjostedt E, Asplund A, et al. Proteomics. Tissue-based map of the human proteome. *Science*. 2015;347(6220):1260419.
